# Supplementary material for: The Melanocortin Receptor Accessory Protein 2 promotes food intake through inhibition of the Prokineticin Receptor-1
Source: eLife journal article supplement (doi:10.7554/elife.12397), 2016-02-01
Supplement: supp [file elife_poa_e12397_Figure_1_figure_supplement_1.pdf › elife_poa_e12397_Figure_1_figure_supplement_1.pdf]

Figure 1 – Supplement 1

A

**Prokr1 gene Chromosome 6**

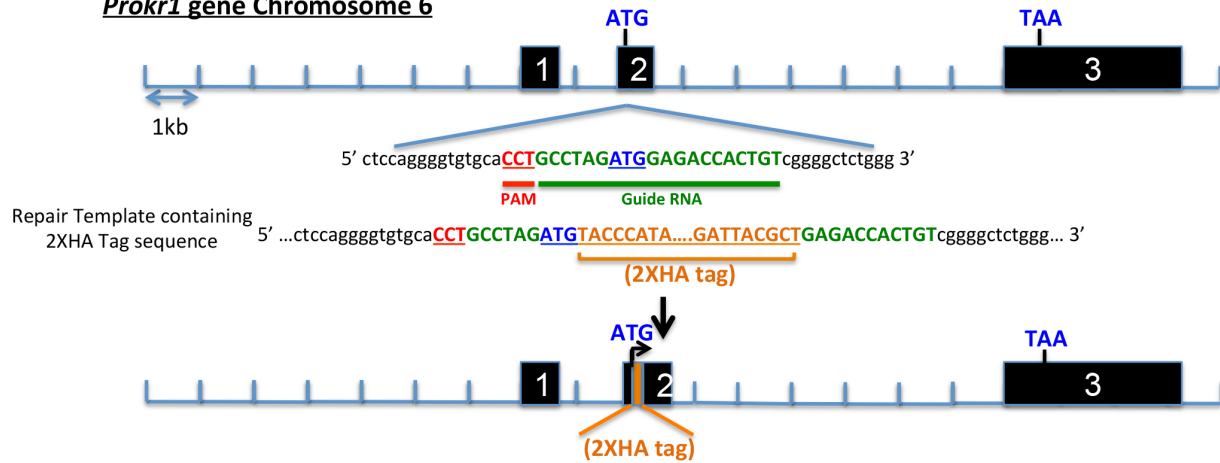

B

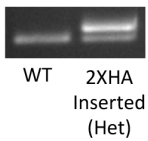

C

Genomic sequence of targeted 2HA-*Prokr1* mouse:

148 150 160 170 180 190 200 210 220 230 240  
 AGTGGGACTGCTCCAGGGGTGTGCACCTGCTCAGTGTACCCATACCATGTGCCAGATTAGCTTACCCATACCATGTGCCAGATTACGCTGAGAACCTGTGCTGGGGCTCT  
 .....  
 .....  
 V G L L Q G C A R A . M V P V D V P D V A V P V D V P D V A E T T V G A L
